1  
2  
3  
4  
5  
6  
7  
8  
9  
10  
11  
12  
13  
14  
15  
16  
17  
18  
19  
20  
21  
22  
23  
24  
25  
26  
27  
28  
29  
30  
31  
32  
33  
34  
35  
36  
37  
38  
39  
40  
41  
42  
43  
44  
45  
46  
47

## **Collective sperm movements are shaped by post-copulatory sexual selection and phylogenetic history in *Peromyscus* mice**

Kristin A. Hook, W. David Weber, Heidi S. Fisher\*

Department of Biology, University of Maryland, 1200 Biology-Psychology Building,  
4094 Campus Drive, College Park, MD 20742, U.S.A.

\* Heidi S. Fisher  
Email: [hsfisher@umd.edu](mailto:hsfisher@umd.edu)

### *Keywords:*

mating systems; sexual selection; sperm competition; sperm conjugation; sperm motility

### *Author Contributions:*

KAH and HSF conceived of the study, designed experiments, and interpreted results; KAH and WWD collected the data, KAH carried out the statistical analyses; all authors wrote the manuscript, gave final approval for publication, and agree to be held accountable for the work presented.

### *Funding:*

This work was supported by a Eunice Kennedy Shriver National Institute of Child Health and Human Development K99/R00 Pathway to Independence Award to HSF [R00HD071972] and a National Science Foundation Postdoctoral Research Fellowship to KAH [1711817].

48 **Abstract**

49 Sperm of some species form motile, coordinated groups as they migrate through the female  
50 reproductive tract to the site of fertilization. This collective motion is predicted to improve sperm  
51 swimming performance and therefore may be beneficial in a competitive context, but limited  
52 evidence supports this theory. Here we examine sperm aggregates across closely-related species of  
53 *Peromyscus* mice that naturally vary by mating system, and thus sperm competition intensity. We  
54 find that phylogenetic history predicts the likelihood that sperm will aggregate, and that relative  
55 testis size is negatively associated with variation in number of aggregated cells, suggesting that  
56 sperm competition has a stabilizing effect on sperm group size. Moreover, we show that  
57 aggregates are kinematically beneficial for some species but costly for others, and these  
58 differences are largely dependent on the orientation and composition of sperm within the groups.  
59 In addition, when we compared sperm of the two sister-species that aggregate most frequently, we  
60 find that sperm from the species that evolved under intense sperm competition forms aggregates  
61 with more efficient geometry more frequently than sperm from its monogamous congener. These  
62 results are consistent with the prediction that sperm aggregation evolved to improve motility in a  
63 competitive context; however, when monogamy evolved secondarily, relaxed sexual selection  
64 allowed for less efficient strategies to persist. Together, our findings in *Peromyscus* reveal that  
65 collective sperm behavior is likely to evolve rapidly and is shaped by changes in the selective  
66 regime.

67

68 **Introduction**

69 Sperm cells are one of the most diverse cell types in nature and exhibit striking variation both  
70 within and across taxa (1). In addition to being morphologically diverse, sperm may exhibit  
71 complex, emergent behaviors, including sperm conjugation, which occurs when two or more cells  
72 join together for motility or transport through the female reproductive tract before dissociating  
73 prior to fertilization (1, 2). Although relatively rare, these sperm-sperm interactions have evolved

74 multiple times across independent lineages of internally fertilizing species (3, 1, 2), yet the  
75 adaptive significance of these gametic interactions remains unclear for many taxa.

76 One functional hypothesis posits that sperm aggregates may be advantageous if the combined  
77 force generated by multiple flagella enable sperm conjugates to swim faster than single cells (4, 5).  
78 Improved sperm motility can be beneficial if it enables cells to move quickly through hostile  
79 environments within the female tract (6, 7), and in competitive environments in which females  
80 mate with multiple males, as sperm velocity is often correlated with competitive fertilization  
81 success (e.g., 7–9). While some studies that have quantified the motility of sperm aggregates have  
82 found empirical support for this hypothesis (e.g., 4, 10–13), others have not (e.g., 14, 15). For  
83 example, sperm groups swim faster than solitary cells in the Norway rat (*Rattus norvegicus*), yet  
84 house mouse (*Mus musculus*) sperm swim slower as groups under identical experimental  
85 conditions (5). Another non-mutually exclusive hypothesis is that sperm aggregation facilitates  
86 migration through viscous or viscoelastic secretions of the female reproductive tract (16, 17),  
87 including cervical mucus (18), which has received some empirical support (e.g., 4, 12, 16), but see  
88 (15). In the grey short-tailed opossum (*Monodelphis domestica*), for example, sperm pairs swim  
89 with greater motility than single sperm in viscous fluids; however, these sperm pairs were  
90 artificially induced to uncouple (16) and therefore the comparison may not be biologically  
91 informative (1). Additionally, sperm aggregation may protect sensitive regions of the sperm, such  
92 as the acrosome, from damage and preserve sperm functionality during passage through the male  
93 or female reproductive tracts (19–22), or enhance egg penetration during fertilization (23) but see  
94 (24). While it is often assumed that coordinated sperm movements are adaptive, inconsistent  
95 findings and a wide diversity of naturally variable sperm behavior have limited our understanding  
96 of the functional advantages of sperm aggregation.

97 Multiple independent origins of sperm conjugation suggest that the functional consequences,  
98 as well as mechanisms that regulate these cellular interactions, are likely to vary throughout nature  
99 (reviewed in 2). Indeed, the formation of sperm aggregates and the number of grouped cells varies

100 widely across taxa (7). In mammals alone, sperm of some species assemble during epididymal  
101 transport and are molecularly “glued” to one another as bi-flagellate pairs in grey short-tailed  
102 opossums (25), as bundles of roughly 100 cells in monotremes (26), or as organized rouleaux of  
103 five or more cells in guinea pigs (*Cavia porcellus*, 24). Conversely, mammalian sperm may also  
104 assemble after ejaculation to form variably-sized groups. For instance, sperm may form temporary  
105 clusters of up to sixteen cells in bulls (*Bos Taurus*, 15) or more fixed groups of up to 30 cells in  
106 house mice (5), 50 cells in the Norway rat (5), or thousands of cells in the wood mouse (*Apodemus*  
107 *sylvaticus*, 4) whereby the hook-shaped heads interlock or attach to the flagella of other sperm. For  
108 these latter species in which sperm groups form after ejaculation, both single and aggregated  
109 sperm typically co-occur, thus allowing for direct comparisons between collective and solitary  
110 sperm movements within an ejaculate while controlling for within-male variability.

111 Closely-related species in the rodent genus, *Peromyscus*, produce sperm that naturally vary in  
112 their collective behavior. Sperm of some species assemble temporary groups after ejaculation by  
113 adhering to one another at their head region (27) and disassemble prior to fertilization (10). In *P.*  
114 *maniculatus*, sperm selectively group with the most closely-related cells to form motile groups of  
115 up to 30 cells (10), but there is a non-monotonic association between group size and swimming  
116 velocity, indicating that some groups are faster than single cells but others are not (28).  
117 Conversely, sperm produced by their sister-species, *P. polionotus*, also form aggregates but do so  
118 indiscriminately with related and unrelated cells (10), are less likely to be optimally-sized, and  
119 overall move in a less linear trajectory (28). Intriguingly, sperm competition is predicted to be  
120 more intense in *P. maniculatus* than in *P. polionotus* due to their different mating systems. In *P.*  
121 *maniculatus*, both sexes mate with multiple partners, often in overlapping series just minutes apart  
122 (29), and females frequently carry multiple-paternity litters in the wild (30), whereas both  
123 behavioral (31) and genetic data (32) indicate that *P. polionotus* is strictly monogamous. Evidence  
124 suggests that monogamy has evolved at least twice within the *Peromyscus* lineage (reviewed in 33;  
125 34), thus enabling us to investigate if post-copulatory sexual selection, driven by female mating

126 behavior, has shaped the evolution of sperm aggregation (4) more broadly across the *Peromyscus*  
127 lineage. In this study, we quantify intra- and inter-specific differences in the size and performance  
128 of sperm aggregates under consistent, controlled conditions to examine the evolution of collective  
129 sperm behavior and empirically test whether sperm aggregation improves swimming performance.

130

## 131 **Results**

132 We investigated the frequency of sperm aggregation in each species and found significant  
133 differences in the proportion of aggregated cells among species (binomial GLMM:  $n = 134$ ,  $P <$   
134  $0.001$ ; Table 1, 2; Figure 1), with more variance across species than within species (variance  
135 across species = 0.10; variance within each species  $< 0.10$ ). Specifically, sperm from *P.*  
136 *maniculatus* and *P. polionotus* similarly aggregate the most, whereas *P. leucopus* and *P.*  
137 *gossypinus* sperm similarly aggregate the least among all the species. Pairwise comparisons  
138 adjusted for multiple comparisons using LSmeans revealed that species within these pairs do not  
139 significantly differ from one another, whereas all other pairwise species comparisons do (Table 1,  
140 2). The coefficient of variation (CV) for the proportion of cells aggregated within each species are  
141 as follows: 68.8% for *P. californicus*, 50.6% for *P. eremicus*, 14.4% for *P. polionotus*, 10.8% for  
142 *P. maniculatus*, 125.7% for *P. leucopus*, and 60.5% for *P. gossypinus*. Controlling for phylogenetic  
143 relationships and body mass, we found no effect of testis size ( $F_{2,3} = 2.606$ ,  $P = 0.15816$ ) or the  
144 within-species CV ( $F_{2,3} = 0.3603$ ,  $P = 0.5604$ ) on the proportion of aggregated cells.  
145 Moreover, we found significant differences in the mean number of cells aggregated among species  
146 (LM:  $F_{6,126} = 56.37$ ,  $P < 0.001$ ; Table 1, 2; Figure 2A), with more variance observed across species  
147 ( $s^2 = 1.96$ ) than within species ( $s^2 < 1.00$ , except for *P. polionotus* [ $s^2 = 2.15$ ]). Post-hoc pairwise  
148 comparisons revealed that both *P. maniculatus* and *P. polionotus* produce the largest sperm  
149 aggregates ( $P < 0.05$  for all pairwise comparisons), whereas *P. gossypinus*, *P. leucopus*, and *P.*  
150 *californicus* produce the smallest aggregates ( $P < 0.05$  for pairwise comparisons), the latter of  
151 which produces sperm cell aggregates that are statistically similar in size to those produced by *P.*

152 *eremicus* ( $P = 0.9203$ ; Figure 2A). Controlling for phylogenetic relationships and body mass, we  
153 found a significant effect of testis weight on the within-species CV of aggregate size ( $F_{2,3} = 8.398$ ,  
154  $P = 0.02655$ , Figure 2B), but found less of an effect on the direct measure of aggregate size ( $F_{2,3} =$   
155  $3.058$ ,  $P = 0.1522$ ). The CV for the number of cells aggregated within each species were as  
156 follows: 26.5% for *P. californicus*, 19.2% for *P. eremicus*, 27.5% for *P. polionotus*, 18.4% for *P.*  
157 *maniculatus*, 13.3% for *P. leucopus*, and 7.2% for *P. gossypinus*.

158 By comparing sperm aggregate composition and orientation within the species that produce  
159 the largest and most frequent sperm aggregates, we found that there are significantly more sperm  
160 aggregates in *P. maniculatus* in which all sperm are aligned in a head-to-flagella orientation  
161 (99.1%, 731/738) than in *P. polionotus* (87.5%, 720/826; GLM:  $n = 42$ ,  $P = 3.92e-12$ ) and that  
162 these aggregates have significantly faster speeds (VCL) compared to aggregates with unaligned  
163 cell orientations in both species (Figure 3; paired t-tests: *P. maniculatus*  $t = 5.9627$ ,  $df = 4$ ,  $P =$   
164  $0.003972$ ; *P. polionotus*  $t = 11.247$ ,  $df = 11$ ,  $P = 2.257e-07$ ). We also found that there are  
165 significantly fewer sperm aggregates in *P. maniculatus* with immotile, stuck, or morphologically  
166 abnormal cells (8.1%, 64/795) than in *P. polionotus* (11.5%, 94/814; binomial GLM:  $n = 40$ ,  $P =$   
167  $0.00503$ ). Importantly, aggregates with these defects had significantly lower speeds (VCL)  
168 compared to aggregates without in both species (*P. maniculatus*  $VCL_{aligned} = 179.60 \pm 6.88 \mu\text{m}/\text{sec}$ ,  
169  $VCL_{defective} = 132.47 \pm 6.18 \mu\text{m}/\text{sec}$ , paired t-test:  $t = 20.627$ ,  $df = 14$ ,  $P = 7.075e-12$ ; *P. polionotus*  
170  $VCL_{aligned} = 135.48 \pm 3.51 \mu\text{m}/\text{sec}$ ,  $VCL_{defective} = 115.62 \pm 5.22 \mu\text{m}/\text{sec}$ , paired t-test:  $t = 16.312$ ,  $df$   
171  $= 20$ ,  $P = 5.079e-13$ ).

172 When comparing the proportion of motile and progressively motile aggregates across species,  
173 our pairwise comparisons revealed that *P. eremicus* produced a significantly smaller proportion of  
174 motile aggregates than all other species ( $P < 0.05$  for all *P. eremicus* pairwise comparisons;  $P >$   
175  $0.05$  for all other pairwise comparisons). Fitted values of the proportion of motile aggregates using  
176 LSmeans were  $0.77 \pm 0.04$  for *P. eremicus*,  $0.92 \pm 0.02$  for *P. polionotus*,  $0.91 \pm 0.02$  for *P.*  
177 *gossypinus*,  $0.95 \pm 0.01$  for *P. maniculatus*,  $0.93 \pm 0.02$  for *P. leucopus*, and  $0.91 \pm 0.02$  for *P.*

178 *californicus*. Moreover, post-hoc comparisons revealed that *P. eremicus*, *P. polionotus*, and *P.*  
179 *gossypinus* all had the smallest proportions of progressively motile aggregates ( $P < 0.05$  for all  
180 pairwise comparisons; fitted values using LSmeans were  $0.64 \pm 0.06$ ,  $0.65 \pm 0.05$ , and  $0.75 \pm 0.05$ ,  
181 respectively), the latter species of which did not significantly differ from *P. californicus* ( $P =$   
182  $0.1981$ ;  $0.87 \pm 0.02$  for LSmeans fitted values). Conversely, *P. maniculatus* and *P. leucopus* had  
183 the largest proportions of progressively motile aggregates ( $P = 0.3417$ ; fitted values using  
184 LSmeans were  $0.94 \pm 0.02$  and  $0.91 \pm 0.02$ , respectively), the latter of which did not differ from *P.*  
185 *californicus* ( $P = 0.9109$ ).

186 Overall, we found species-specific differences in the effect of sperm aggregation on motility,  
187 regardless of environmental complexity (Table 3, Figure 4). In low-viscosity medium, we found  
188 that sperm aggregates have a significantly greater VCL in *P. maniculatus*, VSL in *P. maniculatus*,  
189 *P. leucopus*, and *P. californicus*, LIN in *P. leucopus*, and VAP in *P. californicus* compared to  
190 single cells. Conversely, sperm aggregates had a significantly lower VCL, VSL, and VAP velocity  
191 in *P. polionotus* and *P. gossypinus* than single sperm in the low-viscosity medium (Figure 4). In  
192 the high-viscosity medium, we found that sperm aggregates have a significantly greater VCL in *P.*  
193 *maniculatus* and *P. californicus* and a higher VSL and VAP in *P. californicus* (Figure 4) compared  
194 to single sperm. Conversely, sperm aggregates in the high viscosity medium had a significantly  
195 lower LIN in *P. californicus*, *P. eremicus*, *P. polionotus*, and *P. maniculatus* as well as a reduced  
196 VSL and VAP in *P. polionotus* than single cells (Figure 4).

197

## 198 **Discussion**

199 While it is known that collective sperm behaviors have evolved independently in a number of  
200 taxa (2), it remains unclear how sperm aggregation evolves among closely related species. Our  
201 comparative study reveals that sperm aggregating behaviors vary across mice in the genus  
202 *Peromyscus*. We observed an effect of phylogenetic history on the frequency of sperm  
203 aggregation, indicating that collective sperm behavior likely evolved prior to the divergence of

204 present-day species. Additionally, we find a negative association between relative testis weight, a  
205 robust proxy for intensity of sperm competition in rodents (35), and the coefficient of variation for  
206 the number of cells in aggregate, suggesting that sexual selection has a stabilizing effect on sperm  
207 aggregate size. We then compared the motility of single sperm and sperm aggregates across all  
208 species under low- and high-viscosity conditions, and show that aggregation is kinematically  
209 beneficial for some species yet costly for others, regardless of environmental complexity. When  
210 examining sperm from the species that aggregate the most profoundly, we find that the formation  
211 of the aggregates and the orientation of the cells within the group are critical to kinematics.  
212 Moreover, we observe more aggregates with efficient geometry in the species that has evolved  
213 under strong post-copulatory sexual selection compared to its monogamous sister-species. These  
214 findings support the prediction that sperm aggregation evolved in *Peromyscus* to improve motility  
215 in a competitive context but reveal that relaxed selection may have enabled less efficient strategies  
216 to persist, thereby generating diversity in collective sperm behaviors within these closely-related  
217 species.

218 Our results reveal distinct species-specific differences across *Peromyscus* mice in the  
219 frequency of sperm aggregation and the average size of these cellular groups. Multiple  
220 *Peromyscus* species produce sperm that aggregate more extensively than other studied muroid  
221 rodents (36), with the notable exception of the wood mouse (4). In general, the proportion of  
222 sperm cells that aggregate is most similar within each sister-species pair. Specifically, *P.*  
223 *maniculatus* and *P. polionotus* produce sperm that aggregate the most (>80% of sperm), but the  
224 pair they are most closely-related to, *P. gossypinus* and *P. leucopus*, are the species least likely to  
225 produce sperm that aggregate (<10% of sperm); the most distantly-related species pair we  
226 assessed, *P. californicus* and *P. eremicus*, both produce sperm with a moderate propensity to  
227 aggregate (~25% of sperm). These findings support one of two possibilities for the evolution of  
228 sperm aggregates within these species: (a) a genus-wide ancestral trait of moderate sperm  
229 aggregation with subsequent diversification leading to an increase in *P. maniculatus* and *P.*



230 *polionotus* and a decrease in *P. gossypinus* and *P. leucopus*, or (b) the independent evolution of  
231 aggregation in the ancestors of the *P. californicus*-species pair and the *P. maniculatus*-species pair.  
232 Such complex evolutionary histories with losses and recurrences of sperm conjugation, and  
233 subsequent species divergence, have also been demonstrated in diving beetles (Dytiscidae, 37),  
234 consistent with the evolutionary lability that we observe. Our experimental results may explain  
235 selection against sperm aggregation if forming groups reduces sperm swimming performance,  
236 which we find in at least one species, *P. gossypinus*. However, we found that sperm produced by  
237 their sister-species, *P. leucopus*, also rarely aggregate, despite our observation that these rare  
238 collective groups have a greater average velocity and are more linear than single cells.  
239 Interestingly, we observed that these two promiscuous species that rarely aggregate, *P. gossypinus*  
240 and *P. leucopus*, have the largest relative testes of the species studied, suggesting that they may  
241 have evolved increased sperm production to improve competitive fertilization success (sensu 38),  
242 rather than adaptations that influence motility (39). Together these results suggest different  
243 strategies employed by divergent species across the *Peromyscus* genus in response to sperm  
244 competition.

245 In contrast to our results on the frequency of sperm aggregation within species, we found that  
246 the average size of sperm groups does not align as closely with phylogenetic relationships. In  
247 addition, we found that species with relatively larger testes, which is positively associated with  
248 increased sperm competition (35), exhibit less variation (CV) in aggregate size. This result  
249 supports the prediction that relaxed sperm competition allows for greater intermale variation to  
250 persist in a population (40) and suggests that this post-copulatory sexual selection may be  
251 stabilizing sperm aggregate size for a species-specific ‘optimum’ (28). Similarly, other studies  
252 have shown that the strength of sexual selection regulates variance in sperm morphology across  
253 taxa and at multiple levels of organization, including within- and between-males (41–43) as well  
254 as within- and between-species (40, 44). A study on sperm bundles across ten *Carabus* ground  
255 beetles also found intense selection on bundle size, which are dimorphic and either small or large;

256 the large, but not small, sperm bundles are positively correlated with measures of sperm  
257 competition risk, including copulatory piece length and mate guarding, suggesting that diversity of  
258 large sperm bundles is associated with sexual selection (45). In contrast to these findings that  
259 competition drives sperm-sperm interactions, a study on the evolution of such sperm traits in  
260 diving beetles found that variation in sperm conjugation is more associated with female  
261 reproductive tract architecture (37, 46). Therefore, while our results suggest that stabilizing  
262 selection on sperm aggregate size is associated with an increase in sperm competition given the  
263 correlation with relative testis weight, mechanisms of female control (47) may also play an  
264 important evolutionary role.

265 We compared the motility of single and aggregated sperm sampled from the same male to test  
266 whether sperm aggregates swim faster or more efficiently than single sperm, which is predicted if  
267 the combined force of multiple flagella enhances their motility (4). We found improved kinematic  
268 measures in half of the species studied (*P. maniculatus*, *P. californicus*, and *P. leucopus*), thus  
269 supporting this functional hypothesis; however, in several species we found aggregation had some  
270 negative (*P. polionotus* and *P. gossypinus*) or no (*P. eremicus*) impact on motility relative to single  
271 sperm cells. While we found support for a theoretical prediction that sperm aggregates achieve  
272 greater straight-line velocity because they move in a more linear path of travel rather than at a  
273 faster speed (i.e., curvilinear velocity, 28) in two of our six focal species (*P. californicus* and *P.*  
274 *leucopus*), we did not find this kinematic benefit for sperm aggregation in all *Peromyscus* species.  
275 These results corroborate other studies in more disparate taxonomic groups that have quantified  
276 sperm aggregation motility and found inconsistent results. For example, sperm trains exhibit  
277 greater swimming progressive motility in the wood mouse (4), and greater velocity than individual  
278 sperm in the Norway rat, but not the house mouse (5). In invertebrates, the swimming velocity of  
279 fishfly sperm increases with number of sperm in a bundle (12), but in a marine snail, there is no  
280 differences in swimming speed between paired and single sperm (14). One possible explanation  
281 for these differences across taxa is that cell orientation within an aggregate is critical for its

282 collective motility. Sperm cells are predicted to be faster if they generate increased force with  
283 proportionally less drag (see 2 and references therein); such effects may be true for sperm  
284 aggregations as well in which cells conjoin head-to-tail, thereby increasing the length of the  
285 collective unit, or in which flagella within the group beat synchronously (2). Our results support  
286 that even sperm aggregates that conjoin head-to-head and are thus wider, as they are in  
287 *Peromyscus*, can offer a motility advantage.

288 Our results suggest that relaxed sexual selection may allow the persistence of less optimal  
289 strategies based on the quantitative and qualitative differences we observed among sperm  
290 aggregates of different species. The most interesting motility results are those of the sister-species  
291 pair with divergent mating systems that both form the most frequent and largest sperm aggregates.  
292 In *P. maniculatus*, a promiscuous species, sperm aggregates exhibit greater straight-line and  
293 curvilinear velocity compared to single cells, but the opposite was true for its monogamous  
294 congener, *P. polionotus*. We find that these kinematic differences are associated with differences  
295 in aggregate geometry; when sperm heads and flagella are not oriented in the same direction, the  
296 cells within an aggregate exert opposing forces on one another, thereby reducing the overall  
297 motility of the group (27, 28). Indeed, we found that sperm from the monogamous *P. polionotus*  
298 males are less likely to form aggregates with all sperm aligned and more likely to include immotile  
299 or morphologically abnormal sperm, consequently resulting in slower aggregates than those of *P.*  
300 *maniculatus* (27). This finding is consistent with previous reports that *P. polionotus* sperm tend to  
301 form optimal-sized aggregates less often than in *P. maniculatus* (28). Together, these observations  
302 further support the hypothesis that sperm aggregation evolved prior to the divergence of the  
303 species pair (10), and when monogamy evolved secondarily in *P. polionotus* (34, 48), relaxed  
304 sexual selection allowed for the persistence of less motile sperm traits. In line with this prediction,  
305 we observed the smallest proportion of motile and progressively motile sperm aggregates in  
306 another monogamous species, *P. eremicus*, but the largest proportion of progressively motile  
307 aggregates in two promiscuous species, *P. maniculatus* and *P. leucopus*. Similar results have been

308 reported in house mice, in which males evolving under intense sperm competition produced a  
309 greater proportion of motile sperm, compared to males from lineages subject to relaxed selection  
310 (49). Together these findings support that the motility benefits conferred by sperm aggregation are  
311 associated with variation in post-copulatory sexual selection.

312 When we compared single and aggregated sperm in a viscous environment to test if  
313 aggregation improves motility in more complex fluids, similar to the secretions or cervical mucus  
314 (18) of the female reproductive tract (17, 50), we found that collective motion is beneficial for  
315 some species but costly for others. Compared to single sperm, aggregates swim with greater  
316 curvilinear velocity in *P. maniculatus* and *P. californicus*, and greater straight-line and average  
317 path velocities in *P. californicus*, but aggregates were less linear than single cells in all species  
318 except for *P. leucopus* and *P. gossypinus*. While other studies have found kinematic benefits for  
319 sperm conjugates compared to single cells in higher viscosities in the gray short-tailed opossum  
320 (16), the wood mouse (4), and the fishfly (12), a study in bulls found that sperm were slower,  
321 exhibited less organized swimming patterns, and were less likely to cluster in viscous fluids (15),  
322 both of which are consistent with our analysis of *Peromyscus* aggregates. Ultimately, the benefit of  
323 sperm aggregation depends on the relative importance of each kinematic parameter during sperm  
324 migration *in vivo*. Although beyond the scope of this study, we predict that improved linearity  
325 afforded by collective motion may help to direct the sperm through the dynamic fluids of the  
326 female reproductive tract (51) and that increased velocity will reduce the time it takes for the  
327 sperm to arrive at the fertilization site.

328 In conclusion, our study highlights the diversity of sperm aggregation within a single  
329 taxonomic lineage and how selection has shaped the formation and performance of these cellular  
330 groups. We show that both evolutionary history and varying levels of post-copulatory sexual  
331 selection influence the frequency and size of sperm groups. Moreover, we find that sperm  
332 aggregation can improve sperm motility in both simple and complex fluids, but this is not  
333 consistent across all species. Theoretical predictions (27, 28) and emerging empirical evidence

334 suggests that motility benefits may only be realized if cells maintain optimal alignment within the  
335 groups and, if achieved, may provide these sperm with a competitive advantage in the female  
336 reproductive tract (46). Future work investigating sperm aggregates *in vivo* (e.g., 51, 52) will shed  
337 light on the co-evolution of these unique gametic behaviors and the enormously variable and  
338 dynamic female reproductive tracts through which sperm must navigate.

339

## 340 **Materials and Methods**

### 341 (a) Sperm collection

342 We obtained captive *Peromyscus maniculatus bairdii*, *P. polionotus subgriseus*, *P. leucopus*,  
343 *P. eremicus*, and *P. californicus insignis* from the Peromyscus Genetic Stock Center at the  
344 University of South Carolina, and *P. gossypinus gossypinus* from Dr. Hopi Hoekstra at Harvard  
345 University and housed them in same-sex cages at 22°C on a 16L:8D cycle in accordance with  
346 guidelines established by the Institutional Animal Care and Use Committee at the University of  
347 Maryland in College Park (protocol R-Jul-18-38). We sought samples from all available captive  
348 *Peromyscus* species and avoided wild-caught specimens to control for variation due to life  
349 experience. We obtained sperm samples from sexually mature males and accounted for relatedness  
350 among the focal males by assigning siblings a unique ‘Family’ ID. We euthanized males via  
351 isoflurane overdose and cervical dislocation, then weighed each male and both testes (Mettler  
352 Toledo, Switzerland). Next, we removed a single caudal epididymis, made several small incisions  
353 in the tissue, and submersed it in sperm medium (Modified Sperm Washing Medium, Irvine  
354 Scientific, USA) that was pre-warmed at 37°C; to reduce differences in sperm density despite  
355 natural variation in epididymal sizes, we varied the volume (50µl - 1000µl) based on tissue size  
356 and accounted for these differences when estimating final sperm counts for each male. To collect  
357 sperm, we agitated the tissue at 300rpm (ThermoMixer F1.5, Eppendorf, Germany) at 37°C for ten  
358 minutes, inverting the tube at the five- and ten-minute mark, then incubated the tissue undisturbed  
359 for two minutes. Using pipette tips cut to create a wider opening, we collected live sperm cells for

360 analysis from just below the meniscus of the solution to enrich for the most motile sperm (53).  
361 Next we estimated sperm density using a computer-assisted sperm analysis (CASA) system (Ceros  
362 II Animal, Hamilton Thorne, USA) and verified with a Neubauer-improved hemocytometer  
363 (Marienfeld, Germany) then diluted samples with pre-warmed medium to reach a standard  
364 concentration of 300-400 cells summed across the five 5-second videos at 100X magnification for  
365 cell tracking optimality and efficiency.

366

367 (b) Live sperm analysis

368 To conduct live sperm observations, we gently reverse pipetted 4 $\mu$ l of the sperm solution into  
369 12 $\mu$ l of pre-warmed medium on a plastic slide within a 9mm x 0.12mm imaging spacer (Grace  
370 Bio-Labs, USA) and covered by a plastic cover slip. This set-up served as a control and represents  
371 a ‘low-viscosity’ environment. To test sperm motility in a ‘high-viscosity’ environment, we  
372 followed the same procedures except that we mixed 4 $\mu$ l of sperm solution with 12 $\mu$ l of pre-  
373 warmed medium enriched with methylcellulose (Sigma Aldrich M 7140; 15cP, 2% in water; 54).  
374 We then recorded 5-second videos at 60 frames/sec on the CASA system, capturing at least five  
375 videos per male but recorded additional videos for samples with lower sperm density ( $n = 57$ ) to  
376 ensure an adequate number of observed cells per male. Videos (see example, Movie S1) were  
377 recorded at 59 $\pm$ 16 minutes post-harvest from the epididymal tissue, dependent on dilutions The  
378 number of videos, tracks, and cells analyzed are reported in Table 1.

379 We characterized sperm aggregation by scoring CASA videos using direct observations  
380 because the system tracks particles, and thus each track may represent a single cell or an  
381 aggregate. We counted the number of cells represented by each track on at least three different  
382 frames/track. From these data, we calculated the proportion of cells that aggregated for each male  
383 by dividing the total number of aggregates by the total number of motile cells across all tracks  
384 (55). Then we calculated the mean number of cells in aggregate (i.e., aggregate size) by dividing  
385 the sum of cells in aggregate by the sum of aggregates, both across all tracks for each male and

386 across all males for each species. Finally, we calculated the coefficient of variation (CV) for both  
387 the proportion and number of cells that aggregated within each species using the following  
388 formula: (standard deviation/mean) x 100. In addition, to further characterize differences in sperm  
389 aggregation for the two species whose sperm were observed to aggregate the most extensively, *P.*  
390 *maniculatus* and *P. polionotus*, we qualitatively scored the composition and orientation of cells  
391 within the sperm aggregates. For males within these species, we calculated the proportion of  
392 aggregates that were: ‘aligned’ in which all sperm adhered to one another in a head-to-flagella  
393 orientation and included no immotile, morphologically abnormal or damaged cells, ‘defective’,  
394 which included one or more sperm that was abnormal, immotile, or stuck to the slide, and  
395 ‘opposed’ if all sperm are normal and motile, but were not oriented in the same direction, the latter  
396 of which included star-shaped aggregates (28).

397 We recorded the following metrics for each recorded track (i.e., single sperm and aggregates):  
398 *straight-line velocity* (VSL; calculated using the straight-line distance between the first and last  
399 detected positions of the sperm head, divided by the time taken to swim the track; also known as  
400 average velocity), *curvilinear velocity* (VCL; calculated using the summed distance between the  
401 sperm head positions in each frame divided by the time taken to travel the track; also known as  
402 speed), *average path velocity* (VAP; the time-averaged velocity of the sperm head along its  
403 average path), and *linearity* (LIN; the ratio of VSL to VCL to measure the straightness of the  
404 trajectory; 56). We calculated the mean of each kinematic parameter for both single cells and  
405 sperm aggregates separately for each of three populations of sperm cells: all cells, motile cells  
406 (i.e., devoid of visually inspected tracks in which cells were unmoving, stuck, or featured an  
407 obvious morphological abnormality such as a kinked midpiece), and progressively motile cells  
408 (i.e., motile cells with a VSL  $\geq 25\mu\text{m}/\text{sec}$ ). We used these data to calculate the proportion of motile  
409 aggregates by dividing the sum of motile aggregates by the total number of sperm aggregates, and  
410 the proportion of progressively motile aggregates by dividing the sum of progressive aggregates  
411 by the total number of sperm aggregates for each male (55). For our kinematic analyses, we

412 focused on the motile sperm dataset to eliminate artifacts from damaged or dead cells, and the total  
413 sperm population to quantify frequency of aggregation and aggregate size in an effort to capture  
414 natural aggregation rates (results from other cell populations are reported in Table S1, Figure S1).

415

416 (c) Statistical analyses

417 We performed all statistical analyses using R version 3.4.2 (57) and visually inspected  
418 diagnostic plots (qqplots and plots of the distribution of the residuals against fitted values) to  
419 validate model normality. Only the best fitting models are reported here. We created all figures  
420 using the ‘ggplot2’ package with R (58). One *P. californicus* male was excluded from the  
421 aggregate analysis dataset because their measurements represented clear outliers. All means are  
422 presented  $\pm$  1 standard error.

423 To compare species differences in the proportion of aggregated cells, we used the mean values  
424 for each male and a generalized linear mixed model (GLMM) using the glmer function from the  
425 “lme4” R package and a logit link function (59). The binomial response was the number of sperm  
426 cells in aggregate, and the total number of sperm cells was the binomial denominator. In the initial  
427 statistical model, we observed the residual deviance to be larger than the residual degrees of  
428 freedom, which is an indication of overdispersion (55). We thus used an observation-level random  
429 effect (OLRE) as a random factor in all subsequent analyses to control for overdispersion (60). We  
430 considered family ID as a random factor in the initial model and both random factors were then  
431 used in bivariate analyses for predictors of interest that could potentially explain differences in the  
432 proportion of aggregated cells. These predictors included male age, pairing status, the timing of  
433 video recordings relative to harvest of the epididymal tissue, and the number of videos recorded.  
434 Only predictors that had a *p*-value at or below 0.20 were considered for the final model. We  
435 further screened these predictors for collinearity with other significant predictors using linear  
436 models and removed collinear predictors, so that only the one with greater relative significance  
437 was included in the final GLMM. The remaining model included pairing status and species as



438 fixed factors. We calculated the variance inflation factor (VIF) values and found evidence of  
439 collinearity due to two VIF values above the recommended threshold of three (61). Thus, we  
440 removed pairing status as a fixed factor and family ID as a random factor, leaving only species as  
441 a fixed factor within our final model. Post-hoc pairwise comparisons were performed using Tukey  
442 HSD adjustments for multiple comparisons from the “LSmeans” R package (62).

443 To compare species differences in the number of aggregated cells, we used the mean values  
444 for each male and initially used a linear mixed model (LMM) using the lmer function from the  
445 “lme4” R package, but eventually reverted to using a linear model (LM) because the family ID  
446 random factor did not significantly contribute to the residual variability in the response variable.  
447 Predictors that were considered for the initial LMM included male age, pairing status, the timing  
448 of video recordings relative to harvest of the epididymal tissue, total sperm cells, number of  
449 recorded videos, an interaction between the latter two variables, and the ratio of total sperm cells  
450 to the number of videos recorded. We considered predictors with  $p$ -value<0.20 for the final model,  
451 but first screened each for collinearity with other significant predictors using a linear model and  
452 removed whenever collinearity was present so that only the one with the greater relative  
453 significance was included in the final LM. We dropped non-significant explanatory variables one  
454 at a time based on model comparisons using an analyses of variance test to determine the minimal  
455 adequate model, but were unable to meet the normality assumptions for this model. We also  
456 assessed species differences in the proportion of aggregates that were motile or progressively  
457 motile from the total population of aggregates using binomial GLMM. The binomial response was  
458 the number of motile sperm aggregates, and the total number of sperm aggregates was the  
459 binomial denominator. Our final model contained both an OLRE due to detected overdispersion  
460 and family ID as random factors.

461 To determine if sperm aggregates have motility or force benefits over single cells, we initially  
462 performed a principal component analysis (PCA) using three related swimming performance  
463 measures (VSL, VCL, and VAP) to reduce dimensionality and obtain a composite measure for

464 motile solitary and aggregated sperm cells in both low- and high-viscosity media. Because we  
465 found that species distributions overlapped for this composite measure for both single sperm and  
466 aggregates in low- and high-viscosity media (Figures S2 and S3), we focused on individual  
467 kinematic parameters (VSL, VCL, VAP, LIN) within each species separately. Using our dataset of  
468 mean values per male, we used a paired student's t-test to compare each kinematic parameter  
469 between solitary sperm cells and sperm aggregates within males for each separate species to  
470 determine if sperm aggregates have motility benefit over single cells. To determine if aggregates  
471 have a force benefit over single sperm, we conducted these same analyses in high-viscosity media.  
472 We then combined these two datasets in low- and high- viscosity media and compared sperm  
473 aggregate kinematics in both low- and high- viscosity media at the intra-male level using a paired  
474 student's t-test within each species.

475 To assess the structure of *P. maniculatus* and *P. polionotus* aggregates, we used generalized  
476 linear models (GLM) to compare the proportions of 'defective and 'opposed' aggregates to  
477 'aligned' aggregates. For the composition GLM, the binomial response was the number of  
478 'defective' sperm aggregates, and the total number of sperm aggregates that were either 'defective'  
479 or 'aligned' was the binomial denominator. We used a paired student's t-test to compare the VCL  
480 of these aggregates within males. For the orientation GLM, the binomial response was the number  
481 of 'opposed' sperm aggregates, and the total number of sperm aggregates that were either  
482 'opposed' or 'aligned' was the binomial denominator. We used a paired student's t-test to compare  
483 the VCL of these aggregates within males.

484 Finally, to account for variation in phylogenetic relationships among of the species used in this  
485 study, we adopted a phylogenetic generalized least squares approach (63, 64) using the "caper"  
486 (65) and "APE" (66) packages in R and using an ultra-metric phylogenetic tree of *Peromyscus*  
487 (provided by Dr. Roy Neal Platt II, Texas Biomedical Research Institute), based on sequence  
488 variation in the mitochondrial gene, cytochrome B. The species' relationships within this tree  
489 matched those from other previously established phylogenies of *Peromyscus* (34, 67). We used

490 this phylogeny as a covariate in regression analyses to investigate the effect of relative testis  
491 weight on sperm aggregation, including the proportion of aggregated cells and aggregate size, and  
492 the within-species CV for each of these parameters. Finally, to control for differences in male  
493 body when examining testis mass, we included body mass as a separate fixed factor within our  
494 analyses, a method better suited to estimating relative testis weight is size rather than using the  
495 ratio of testis to body mass or residuals (68, 69).

496

497 **Acknowledgments:**

498 We are grateful to Erica Glasper for providing *P. californicus* males and Hopi Hoekstra for  
499 providing *P. gossypinus* males. Thanks to Harrison Arsis, Madeline-Sophie Dang, Catherine Liu,  
500 and Audrey Mvemba for their assistance with video analysis and to Philip Johnson, Danielle  
501 Adams, Sam Church, and Shelby Wilson for statistical advice. We thank Neal Platt for providing  
502 the ultra-metric *Peromyscus* tree for use in our statistical analysis.

503

504 **References:**

- 505 1. S. Pitnick, D. J. Hosken, T. R. Birkhead, “Sperm Morphological Diversity” in Sperm Biology,  
506 An Evolutionary Perspective, T. R. Birkhead, D. J. Hosken, S. Pitnick, Eds. (Academic Press,  
507 2009), pp. 69–149.
- 508 2. D. M. Higginson, S. Pitnick, Evolution of intra-ejaculate sperm interactions: do sperm  
509 cooperate? *Biological Reviews* 86, 249–270 (2011).
- 510 3. S. Immler, Sperm competition and sperm cooperation: the potential role of diploid and haploid  
511 expression. *Reproduction* 135, 275–283 (2008).
- 512 4. H. D. Moore, K. Dvoráková, N. Jenkins, W. Breed, Exceptional sperm cooperation in the  
513 wood mouse. *Nature* 418, 174–177 (2002).
- 514 5. S. Immler, H. D. Moore, W. Breed, T. Birkhead, By hook or by crook? Morphometry,  
515 competition and cooperation in rodent sperm. *PloS one* 2, e170 (2007).

- 516 6. T. R. Birkhead, A. P. Møller, W. J. Sutherland, Why do females make it so difficult for males  
517 to fertilize their eggs? *Journal of Theoretical Biology* 161, 51–60 (1993).
- 518 7. T. Pizzari, K. R. Foster, Sperm sociality: cooperation, altruism, and spite. *PLoS Biology* 6  
519 (2008).
- 520 8. T. R. Birkhead, J. G. Martinez, T. Burke, D. P. Froman, Sperm mobility determines the  
521 outcome of sperm competition in the domestic fowl. *Proceedings of the Royal Society of*  
522 *London. Series B: Biological Sciences* 266, 1759–1764 (1999).
- 523 9. M. J. G. Gage, C. P. Macfarlane, S. Yeates, R. G. Ward, J. B. Searle, G. A. Parker,  
524 Spermatozoal traits and sperm competition in Atlantic salmon: relative sperm velocity is the  
525 primary determinant of fertilization success. *Current Biology* 14, 44–47 (2004).
- 526 10. H. S. Fisher, H. E. Hoekstra, Competition drives cooperation among closely related sperm of  
527 deer mice. *Nature* 463, 801 (2010).
- 528 11. M. Percy, N. Delescaille, P. Lybaert, S. Aron, Team swimming in ant spermatozoa. *Biology*  
529 *Letters* 10, 20140308 (2014).
- 530 12. F. Hayashi, Sperm co-operation in the fishfly, *Parachauliodes japonicus*. *Functional Ecology*  
531 12, 347–350 (1998).
- 532 13. D. M. Woolley, R. F. Crockett, W. D. I. Groom, S. G. Revell, A study of synchronisation  
533 between the flagella of bull spermatozoa, with related observations. *Journal of Experimental*  
534 *Biology* 212, 2215–2223 (2009).
- 535 14. S. Ishijima, S. A. Ishijima, B. A. Afzelius, Movement of *Turritella* spermatozoa: Direction of  
536 propagation and chirality of flagellar bends. *Cell Motility* 44, 85–95 (1999).
- 537 15. C. K. Tung, C. Lin, B. Harvey, A.G. Fiore, F. Ardon, M. Wu, S. S. Suarez, Fluid  
538 viscoelasticity promotes collective swimming of sperm. *Scientific Reports* 7, 1–9 (2017).
- 539 16. H. D. M. Moore, D. A. Taggart, Sperm pairing in the opossum increases the efficiency of  
540 sperm movement in a viscous environment. *Biol Reprod* 52, 947–953 (1995).

- 541 17. S. S. Suarez, Mammalian sperm interactions with the female reproductive tract. *Cell and*  
542 *Tissue Research* 363, 185–194 (2016).
- 543 18. F. W. Hanson, J. W. Overstreet, The interaction of human spermatozoa with cervical mucus in  
544 vivo. *American Journal of Obstetrics and Gynecology* 140, 173–178 (1981).
- 545 19. D. M. Phillips, Ultrastructure of spermatozoa of the woolly opossum *Caluromys philander*.  
546 *Journal of Ultrastructure Research* 33, 381–397 (1970).
- 547 20. J. M. Bedford, J. C. Rodger, W. G. Breed, Why so many mammalian spermatozoa - a clue  
548 from marsupials? *Proceedings of the Royal Society of London B: Biological Sciences* 221,  
549 221–233 (1984).
- 550 21. D. M. Higginson, K. R. H. Henn, Effects of sperm conjugation and dissociation on sperm  
551 viability in vitro. *PloS one* 7, e34190 (2012).
- 552 22. K. S. K. Tung, A. Okada, R. Anagimachi, Sperm autoantigens and fertilization. I. effects of  
553 antisperm autoantibodies on rouleaux formation, viability, and acrosome reaction of guinea  
554 pig spermatozoa. *Biology of Reproduction* 23, 877–886 (1980).
- 555 23. J. B. Mackie, M. H. Walker, A study of the conjugate sperm of the dytiscid water beetles  
556 *Dytiscus marginalis* and *Colymbetes fuscus*. *Cell Tissue Res.* 148, 505–519 (1974).
- 557 24. S. M. McGlinn, B. A. Shepherd, J. Martan, Rouleau Formation and fertility of spermatozoa in  
558 guinea pigs treated with cyproterone acetate. *Archives of Andrology* 2, 197–202 (1979).
- 559 25. D. A. Taggart, J. L. Johnson, H. P. O'Brien, H. D. M. Moore, Why do spermatozoa of the  
560 American marsupial form pairs? A clue from the analysis of sperm-pairing in the epididymis  
561 of the grey short-tailed opossum, *Monodelphis domestica*. *Anatomical Record* 236, 465–478  
562 (1993).
- 563 26. B. Nixon, H. Ecroyd, J. L. Dacheux, F. Dacheux, V. Labas, S. D. Johnston, R. C. Jones,  
564 Formation and dissociation of sperm bundles in monotremes. *Biology of Reproduction* 95  
565 (2016).

- 566 27. D. J. G. Pearce, L. A. Hoogerbrugge, K. A. Hook, H. S. Fisher, L. Giomi, Cellular geometry  
567 controls the efficiency of motile sperm aggregates. *Journal of The Royal Society Interface* 15,  
568 20180702 (2018).
- 569 28. H. S. Fisher, L. Giomi, H. E. Hoekstra, L. Mahadevan, The dynamics of sperm cooperation in  
570 a competitive environment. *Proceedings of the Royal Society of London B: Biological*  
571 *Sciences* 281, 20140296 (2014).
- 572 29. D. A. Dewsbury, Interactions between males and their sperm during multi-male copulatory  
573 episodes of deer mice (*Peromyscus maniculatus*). *Animal Behaviour* 33, 1266–1274 (1985).
- 574 30. D. A. Birdsall, D. Nash, Occurrence of successful multiple insemination of females in natural  
575 populations of deer mice (*Peromyscus maniculatus*). *Evolution* 27, 106–110 (1973).
- 576 31. D. A. Dewsbury, An exercise in the prediction of monogamy in the field from laboratory data  
577 on 42 species of muroid rodents. *Biologist* 63, 138–162 (1981).
- 578 32. D. W. Foltz, Genetic evidence for long-term monogamy in a small rodent, *Peromyscus*  
579 *polionotus*. *The American Naturalist* 117, 665–675 (1981).
- 580 33. N. L. Bedford, H. E. Hoekstra, The natural history of model organisms: *Peromyscus* mice as a  
581 model for studying natural variation. *eLife Sciences* 4, e06813 (2015).
- 582 34. L. M. Turner, *et al.*, Monogamy evolves through multiple mechanisms: evidence from V1aR  
583 in deer mice. *Molecular Biology and Evolution* 27, 1269–1278 (2010).
- 584 35. S. A. Ramm, G. A. Parker, P. Stockley, Sperm competition and the evolution of male  
585 reproductive anatomy in rodents. *Proceedings of the Royal Society B: Biological Sciences* 272,  
586 949–955 (2005).
- 587 36. M. Tourmente, D. Zarka-Trigo, E. R. S. Roldan, Is the hook of muroid rodent's sperm related  
588 to sperm train formation? *Journal of Evolutionary Biology* 29, 1168–1177 (2016).
- 589 37. D. M. Higginson, K. B. Miller, K. A. Segraves, S. Pitnick, Convergence, recurrence and  
590 diversification of complex sperm traits in diving beetles (Dytiscidae). *Evolution* 66, 1650–  
591 1661 (2012).

- 592 38. G. A. Parker, Why are there so many tiny sperm? Sperm competition and the maintenance of  
593 two sexes. *Journal of Theoretical Biology* 96, 281–294 (1982).
- 594 39. R. R. Snook, Sperm in competition: not playing by the numbers. *Trends in Ecology &*  
595 *Evolution* 20, 46–53 (2005).
- 596 40. S. Calhim, S. Immler, T. R. Birkhead, Postcopulatory sexual selection is associated with  
597 reduced variation in sperm morphology. *PLoS ONE* 2, e413 (2007).
- 598 41. J. L. Fitzpatrick, B. Baer, Polyandry reduces sperm length variation in social insects. *Evolution*  
599 65, 3006–3012 (2011).
- 600 42. S. Immler, S. Calhim, T. R. Birkhead, Increased postcopulatory sexual selection reduces the  
601 intramale variation in sperm design. *Evolution* 62, 1538–1543 (2008).
- 602 43. L. Carballo, A. Battistotti, K. Teltscher, M. Lierz, A. Bublat, M. Valcu, B. Kempenaers,  
603 Sperm morphology and evidence for sperm competition among parrots. *Journal of*  
604 *Evolutionary Biology* 32, 856–867 (2019).
- 605 44. A. Rowley, L. Locatello, A. Kahrl, M. Rego, A. Boussard, E. Garza-Gisholt, R. M. Kempster,  
606 S. P. Collin, E. Giacomello, M. C. Follesa, C. Porcu, Sexual selection and the evolution of  
607 sperm morphology in sharks. *Journal of Evolutionary Biology* 32, 1027–1035 (2019).
- 608 45. Y. Takami, T. Sota, Sperm competition promotes diversity of sperm bundles in *Ohomopterus*  
609 ground beetles. *Naturwissenschaften* 94, 543–550 (2007).
- 610 46. D. M. Higginson, K. B. Miller, K. A. Segraves, S. Pitnick, Female reproductive tract form  
611 drives the evolution of complex sperm morphology. *Proceedings of the National Academy of*  
612 *Sciences* 109, 4538–4543 (2012).
- 613 47. W. Eberhard, *Female Control: Sexual Selection by Cryptic Female Choice* (Princeton  
614 University Press, 1996).
- 615 48. I. F. Greenbaum, R. J. Baker, P. R. Ramsey, Chromosomal evolution and the mode of  
616 speciation in three species of *Peromyscus*. *Evolution* 32, 646–654 (1978).

- 617 49. R. C. Firman, L. W. Simmons, Experimental evolution of sperm competitiveness in a  
618 mammal. *BMC Evolutionary Biology* 11 (2011).
- 619 50. J. E. Simons, S. D. Olson, “Sperm motility: models for dynamic behavior in complex  
620 environments” in *Cell Movement*, M. Stolarska, N. Tarfulea, Eds. (Springer International  
621 Publishing, 2018), pp. 169–209.
- 622 51. Y. Ishikawa, T. Usui, M. Yamashita, Y. Kanemori, T. Baba, Surfing and swimming of  
623 ejaculated sperm in the mouse oviduct. *Biology of Reproduction* 94, 89, 1–9 (2016).
- 624 52. S. Wang, I. V. Larina, In vivo three-dimensional tracking of sperm behaviors in the mouse  
625 oviduct. *Development* 145, dev157685 (2018).
- 626 53. V. Magdanz, S. Boryshpolets, C. Ridzewski, B. Eckel, K. Reinhardt, The swim-up technique  
627 separates bovine sperm by metabolic rates, motility and tail length. *bioRxiv*, 624502 (2019).
- 628 54. S. S. Suarez, X. Dai, Hyperactivation enhances mouse sperm capacity for penetrating  
629 viscoelastic media. *Biology of Reproduction* 46, 686–691 (1992).
- 630 55. M. J. Crawley, *The R Book Second Edition* (John Wiley & Sons, Ltd., 2013).
- 631 56. World Health Organization, “WHO laboratory manual for the examination and processing of  
632 human semen” (2010).
- 633 57. R Core Team, *R: A Language and Environment for Statistical Computing* (R Foundation for  
634 Statistical Computing, 2016).
- 635 58. H. Wickham, *ggplot2: Elegant Graphics for Data Analysis* (Springer, 2016).
- 636 59. D. Bates, M. Mächler, B. Bolker, S. Walker, Fitting linear mixed-effects models using lme4.  
637 *Journal of Statistical Software* 67, 1–48 (2015).
- 638 60. X. A. Harrison, Using observation-level random effects to model overdispersion in count data  
639 in ecology and evolution. *PeerJ* 2, e616 (2014).
- 640 61. A. F. Zuur, E. N. Ieno, C. S. Elphick, A protocol for data exploration to avoid common  
641 statistical problems. *Methods in Ecology and Evolution* 1, 3–14 (2010).



- 642 62. R. V. Lenth, Least-squares means: The R package lsmeans. *Journal of Statistical Software* 69,  
643 1–33 (2016).
- 644 63. M. Pagel, Inferring the historical patterns of biological evolution. *Nature* 401, 877–884  
645 (1999).
- 646 64. R. P. Freckleton, P. H. Harvey, M. Pagel, Phylogenetic analysis and comparative data: a test  
647 and review of evidence. *The American Naturalist* 160, 712–726 (2002).
- 648 65. D. Orme, R. Freckleton, G. Thomas, T. Petzoldt, The caper package: comparative analysis of  
649 phylogenetics and evolution in R. *R package version 5*, 1–36 (2013).
- 650 66. E. Paradis, J. Claude, K. Strimmer, APE: Analyses of phylogenetics and evolution in R  
651 language. *Bioinformatics* 20, 289–290 (2004).
- 652 67. R. D. Bradley, N.D. Durish, D. S. Rogers, J. R. Miller, M. D. Engstrom, C. W. Kilpatrick,  
653 Toward a molecular phylogeny for *Peromyscus*: evidence from mitochondrial cytochrome- *b*  
654 sequences. *Journal of Mammalogy* 88, 1146–1159 (2007).
- 655 68. E. García-Berthou, On the misuse of residuals in ecology: testing regression residuals vs. the  
656 analysis of covariance. *Journal of Animal Ecology* 70, 708–711 (2001).
- 657 69. S. Lüpold, G. M. Linz, J. W. Rivers, D. F. Westneat, T. R. Birkhead, Sperm competition  
658 selects beyond relative testes size in birds. *Evolution* 63, 391–402 (2009)

659

660

661

662

663

664

665

## FIGURES AND TABLES

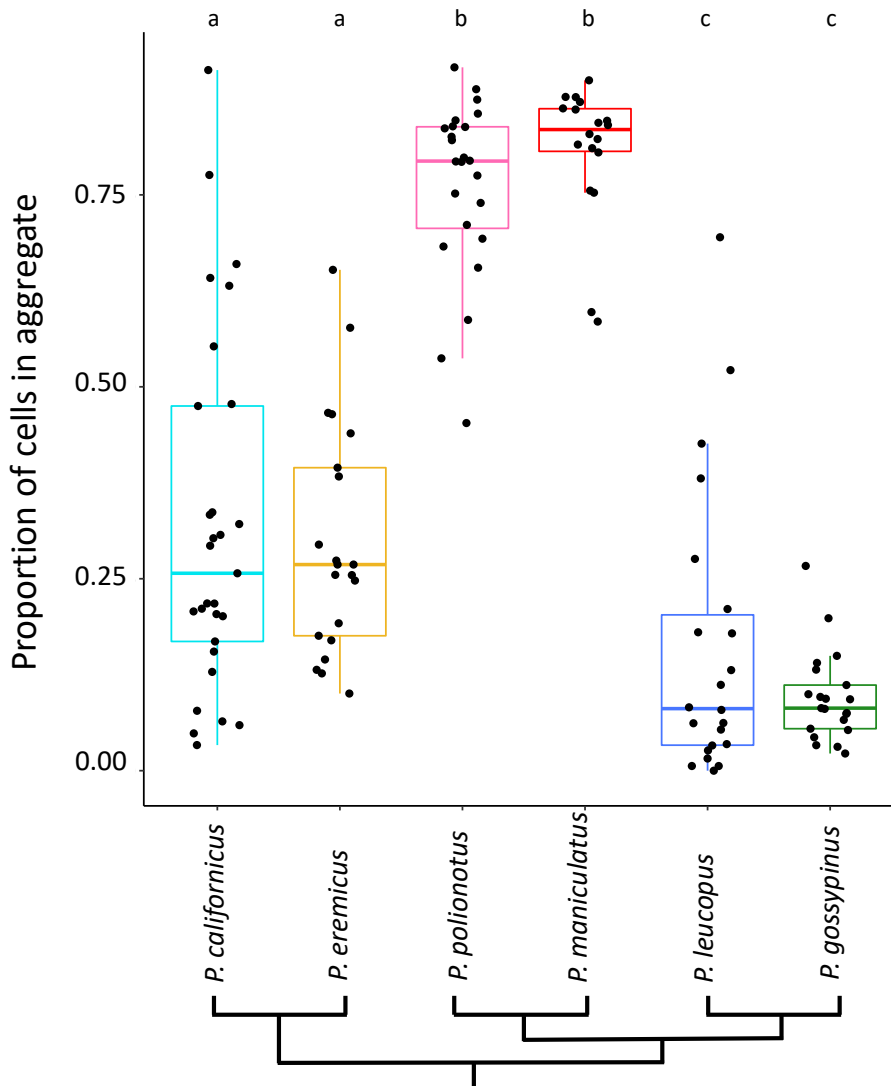

**Figure 1.**

The observed natural variation in the proportion of aggregated sperm cells for six closely related species of *Peromyscus* mice (phylogeny adapted from Bradley et al. 2007). Box-plots represent median and interquartile ranges with raw data overlaid. Statistically significant differences at the  $P = 0.05$  level are denoted by differing letters; shared letters denote no statistical difference.

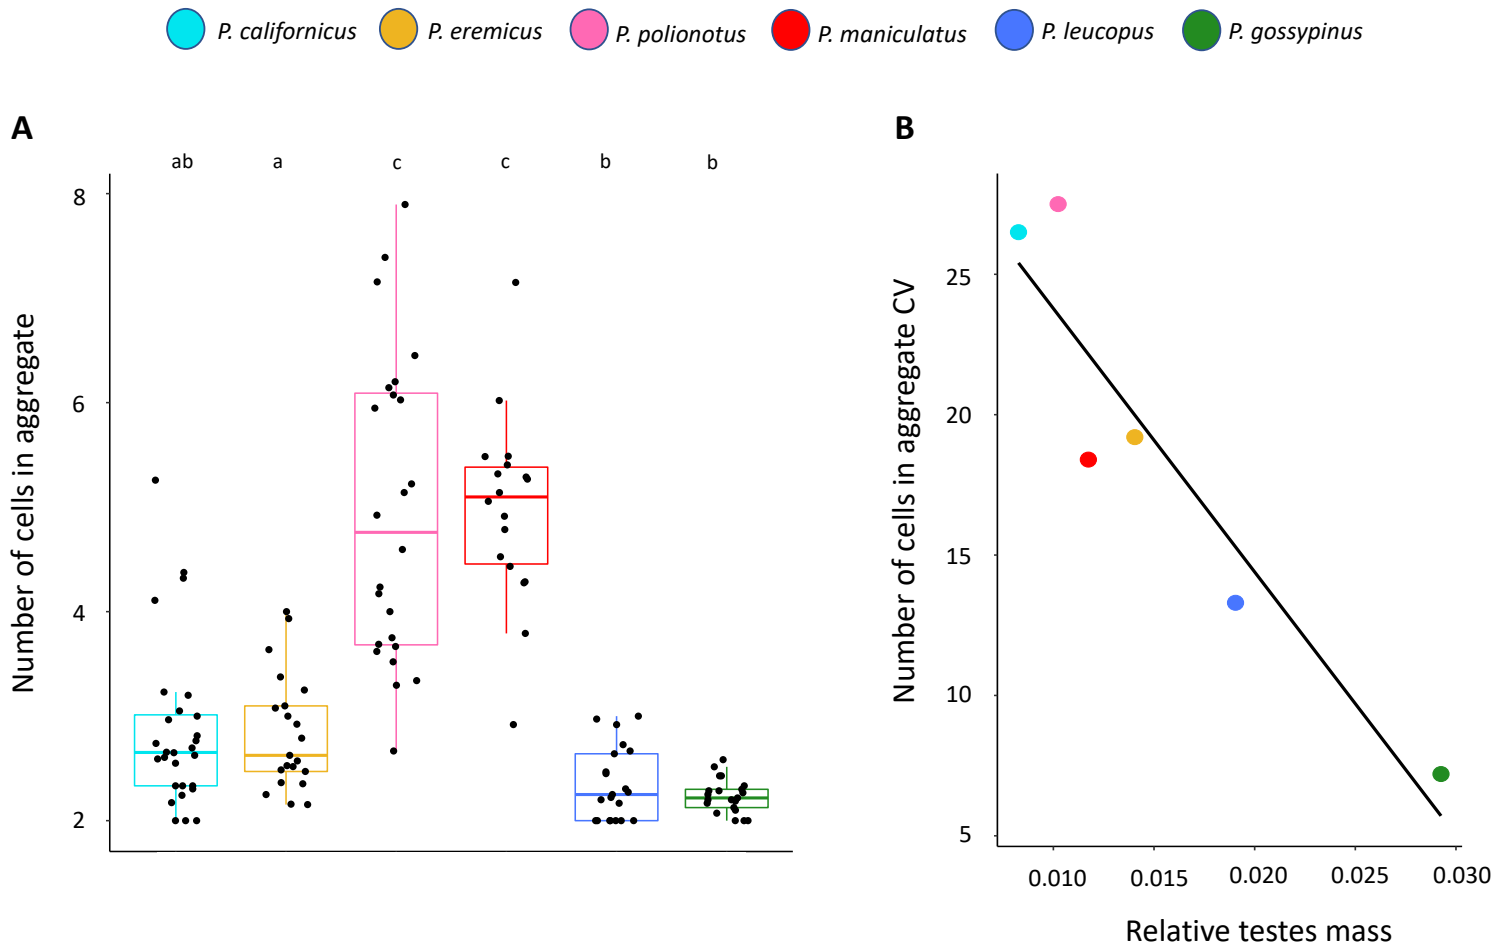

**Figure 2.**

Sperm aggregate size varies among species and is negatively associated with relative testes size. (A) The observed natural variation in the number of aggregated sperm cells for six closely related species of *Peromyscus* mice. Box-plots represent median and interquartile ranges with raw data overlaid. Statistically significant differences at the  $P = 0.05$  level are denoted by differing letters; shared letters denote no statistical difference. (B) When controlling for phylogenetic relationships, the coefficient of variation (CV) for the number of aggregated sperm cells negatively correlates with relative testis mass across these species. Note truncated y-axes.

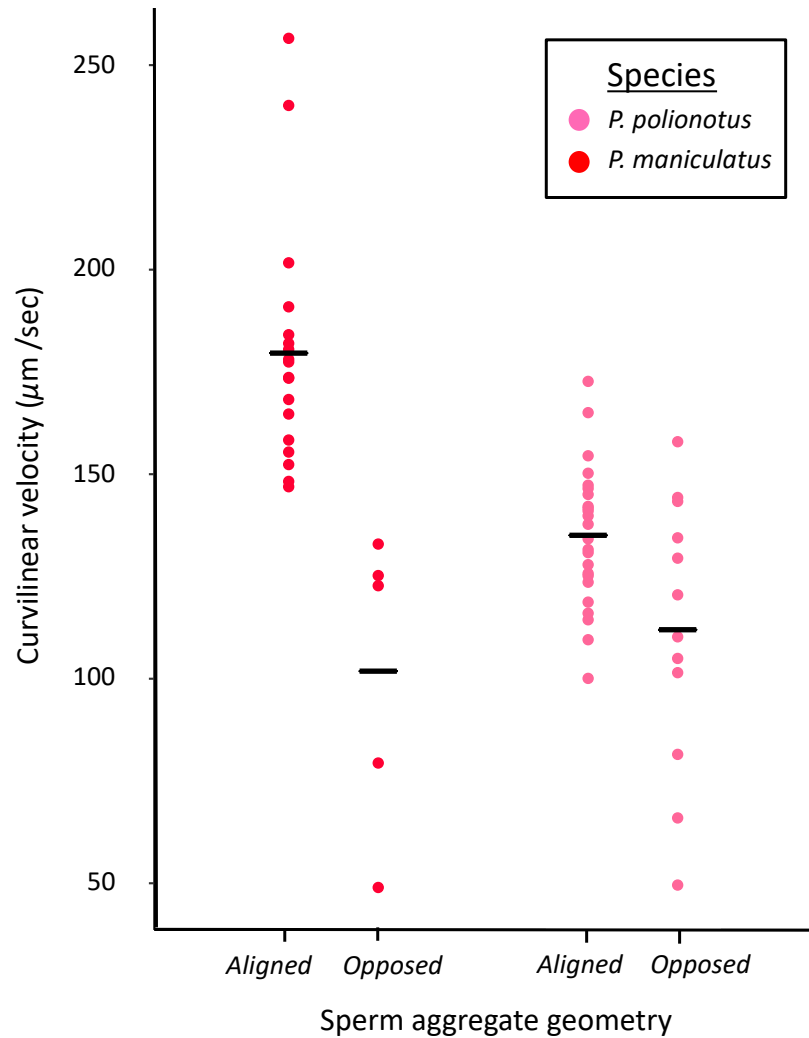

**Figure 3.**

The effect of sperm aggregate geometry on the curvilinear velocity ( $\mu\text{m}/\text{sec}$ ) of sperm aggregates for two species that aggregated most – *Peromyscus maniculatus* and *Peromyscus polionotus*. Circles represent mean values per male within each species, and black lines represent the mean value within each category. Note truncated y-axis.

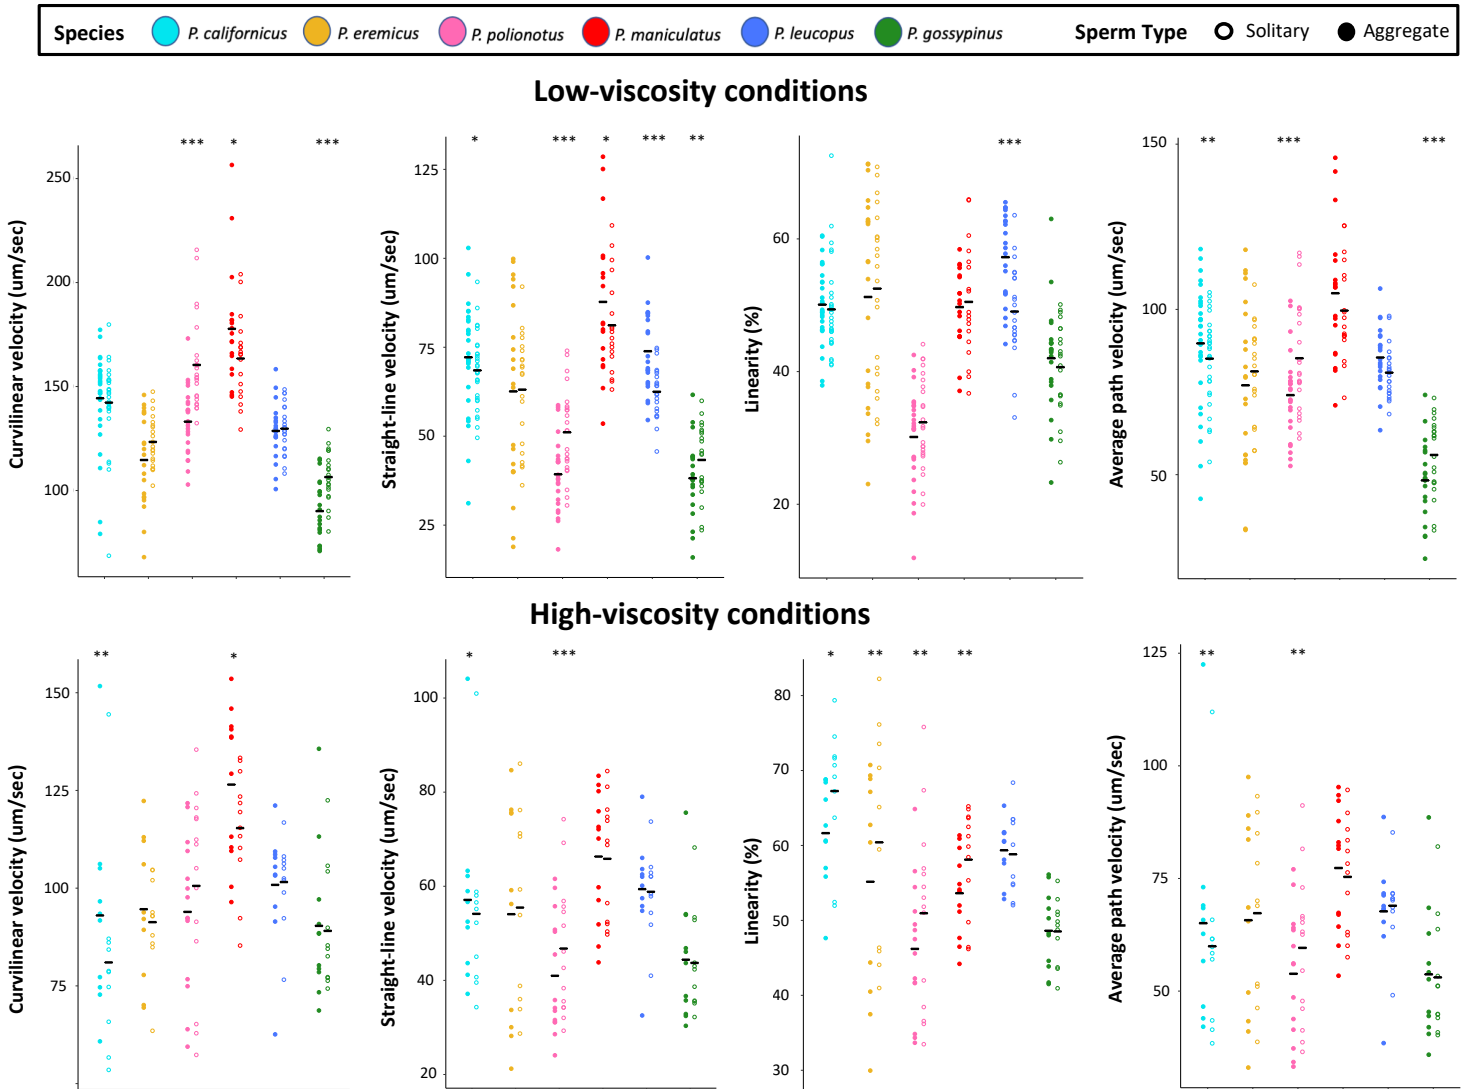

**Figure 4.**

Kinematic parameters of sperm aggregates (closed circles) and solitary sperm cells (open circles) for six species of *Peromyscus* mice in low- and high-viscosity conditions. Circles represent mean values per male, and black lines represent species means. Statistical significance levels comparing aggregated and solitary cells within each species are indicated by \*  $P < 0.05$ , \*\*  $P < 0.01$ , \*\*\*  $P < 0.001$ . Note truncated y-axes.

**TABLE 1.**Summary of live sperm aggregate results for mice in the genus *Peromyscus*

| <i>Peromyscus</i><br>Species                                                                                                                                                      | No.<br>males | No.<br>sperm | % motile<br>sperm | % progressive<br>sperm | No. sperm<br>aggregates | % cells in<br>aggregate | % motile<br>aggregates | % progressive<br>aggregates |
|-----------------------------------------------------------------------------------------------------------------------------------------------------------------------------------|--------------|--------------|-------------------|------------------------|-------------------------|-------------------------|------------------------|-----------------------------|
| <i>californicus</i>                                                                                                                                                               | 28           | 8235         | 81.2%             | 78.9%                  | 823                     | 29.7%<br>(2446/8235)    | 90.5%<br>(745/823)     | 86.6%<br>(713/823)          |
| <i>eremicus</i>                                                                                                                                                                   | 21           | 4906         | 67.4%             | 58.2%                  | 513                     | 30.2%<br>(1481/4906)    | 77.8%<br>(399/513)     | 66.7%<br>(342/513)          |
| <i>polionotus</i>                                                                                                                                                                 | 24           | 6360         | 82.4%             | 57.3%                  | 949                     | 79.5%<br>(5059/6360)    | 90.9%<br>(863/949)     | 66.1%<br>(627/949)          |
| <i>maniculatus</i>                                                                                                                                                                | 18           | 4991         | 85.0%             | 84.3%                  | 822                     | 81.3%<br>(4059/4991)    | 93.4%<br>(768/822)     | 92.3%<br>(759/822)          |
| <i>leucopus</i>                                                                                                                                                                   | 22           | 6341         | 87.6%             | 84.5%                  | 361                     | 15.0%<br>(949/6341)     | 90.3%<br>(326/361)     | 88.1%<br>(318/361)          |
| <i>gossypinus</i>                                                                                                                                                                 | 21           | 5970         | 82.2%             | 70.3%                  | 254                     | 9.6%<br>(576/5970)      | 88.6%<br>(225/254)     | 70.1%<br>(178/254)          |
| Motile sperm cells include only those that exhibited movement patterns. Progressive sperm cells are motile cells with a straight-line velocity $\geq 25 \mu\text{m}/\text{sec}$ . |              |              |                   |                        |                         |                         |                        |                             |

**TABLE 2.**

Fixed effects from a binomial generalized linear mixed model examining differences in the proportion of aggregated sperm cells and a linear model examining differences in the number of aggregated sperm cells across six species of *Peromyscus* mice

| <b>GLMM: PROPORTION OF CELLS IN AGGREGATE</b>                                                                                                                         |              |            |              |        |                |
|-----------------------------------------------------------------------------------------------------------------------------------------------------------------------|--------------|------------|--------------|--------|----------------|
| Model Term                                                                                                                                                            | Beta (SE)    | Exp (beta) | 95% CI       | z      | Pr(> z )       |
| Intercept                                                                                                                                                             | 1.52 (0.22)  |            |              |        |                |
| <i>eremicus</i>                                                                                                                                                       | -2.47 (0.30) | 0.07       | (0.04, 0.13) | -8.14  | < <b>0.001</b> |
| <i>gossypinus</i>                                                                                                                                                     | -3.94 (0.31) | 0.02       | (0.01, 0.03) | -12.89 | < <b>0.001</b> |
| <i>californicus</i>                                                                                                                                                   | -2.58 (0.29) | 0.07       | (0.04, 0.12) | -9.06  | < <b>0.001</b> |
| <i>leucopus</i>                                                                                                                                                       | -3.79 (0.30) | 0.02       | (0.01, 0.04) | -12.46 | < <b>0.001</b> |
| <i>polionotus</i>                                                                                                                                                     | -0.25 (0.29) | 0.44       | (0.30, 0.58) | -0.85  | 0.393          |
| <b>LM: NUMBER OF CELLS IN AGGREGATE</b>                                                                                                                               |              |            |              |        |                |
| Model Term                                                                                                                                                            | Beta (SE)    | Exp (beta) | 95% CI       | t      | Pr(> z )       |
| Intercept                                                                                                                                                             | 3.90 (0.26)  |            |              |        |                |
| Total Sperm Cells                                                                                                                                                     | 0.00 (0.00)  | 0.50       | (0.50, 0.50) | 5.83   | < <b>0.001</b> |
| <i>eremicus</i>                                                                                                                                                       | -1.97 (0.24) | 0.12       | (0.08, 0.18) | -8.15  | < <b>0.001</b> |
| <i>gossypinus</i>                                                                                                                                                     | -2.77 (0.24) | 0.06       | (0.04, 0.09) | -11.53 | < <b>0.001</b> |
| <i>californicus</i>                                                                                                                                                   | -2.19 (0.23) | 0.10       | (0.07, 0.15) | -9.68  | < <b>0.001</b> |
| <i>leucopus</i>                                                                                                                                                       | -2.68 (0.24) | 0.06       | (0.04, 0.10) | -11.18 | < <b>0.001</b> |
| <i>polionotus</i>                                                                                                                                                     | 0.04 (0.23)  | 0.51       | (0.40, 0.62) | 0.16   | 0.877          |
| For both models, all rows are being compared with the intercept – <i>Peromyscus maniculatus</i> . 95% confidence intervals (CI) were calculated for each effect size. |              |            |              |        |                |

**TABLE 3.**

Results from an intra-male analysis comparing motile solitary and aggregated sperm kinematics in low- and high-viscosity conditions for six species of *Peromyscus* mice to test whether sperm aggregates confer kinematic benefits (shaded in gray)

| PEROMYSCUS SPECIES                                       | df | KINEMATIC VARIABLE                    |                                       |                                       |                                      |
|----------------------------------------------------------|----|---------------------------------------|---------------------------------------|---------------------------------------|--------------------------------------|
|                                                          |    | Curvilinear Velocity (µm/sec)         | Linearity (VSL/VCL)                   | Straight-Line Velocity (µm/sec)       | Average Path Velocity (µm/sec)       |
| LOW-VISCOSITY CONDITIONS                                 |    |                                       |                                       |                                       |                                      |
| <i>californicus</i>                                      | 28 | $t = -1.0545, p = 0.3007$             | $t = -0.56153, p = 0.5789$            | $t = -2.2982, p = \mathbf{0.02923}$   | $t = -2.8162, p = \mathbf{0.008805}$ |
| <i>eremicus</i>                                          | 20 | $t = 1.6225, p = 0.1204$              | $t = 0.73517, p = 0.4708$             | $t = 0.1312, p = 0.8969$              | $t = 1.0464, p = 0.3079$             |
| <i>polionotus</i>                                        | 23 | $t = 9.4575, p = \mathbf{2.1566e-09}$ | $t = 1.699, p = 0.1028$               | $t = 5.8355, p = \mathbf{6.026e-06}$  | $t = 6.0729, p = \mathbf{3.408e-06}$ |
| <i>maniculatus</i>                                       | 17 | $t = 2.2482, p = \mathbf{0.03812}$    | $t = 0.48075, p = 0.6368$             | $t = -2.2335, p = \mathbf{0.03924}$   | $t = -1.9206, p = 0.07172$           |
| <i>leucopus</i>                                          | 20 | $t = 0.23337, p = 0.8178$             | $t = -4.8385, p = \mathbf{9.973e-05}$ | $t = -5.5521, p = \mathbf{1.959e-05}$ | $t = -1.838, p = 0.08096$            |
| <i>gossypinus</i>                                        | 20 | $t = 5.4048, p = \mathbf{2.73e-05}$   | $t = -1.0247, p = 0.3177$             | $t = 3.715, p = \mathbf{0.001369}$    | $t = 4.479, p = \mathbf{0.0002298}$  |
| HIGH-VISCOSITY CONDITIONS                                |    |                                       |                                       |                                       |                                      |
| <i>californicus</i>                                      | 9  | $t = -3.7465, p = \mathbf{0.003357}$  | $t = 2.682, p = \mathbf{0.02512}$     | $t = -2.7743, p = \mathbf{0.0216}$    | $t = -4.1106, p = \mathbf{0.002634}$ |
| <i>eremicus</i>                                          | 9  | $t = -0.71739, p = 0.4913$            | $t = 4.2087, p = \mathbf{0.002277}$   | $t = 0.62918, p = 0.5449$             | $t = 0.56505, p = 0.5858$            |
| <i>polionotus</i>                                        | 13 | $t = 2.0349, p = 0.06278$             | $t = 3.9242, p = \mathbf{0.001745}$   | $t = 4.8314, p = \mathbf{0.0003279}$  | $t = 4.18, p = \mathbf{0.001079}$    |
| <i>maniculatus</i>                                       | 11 | $t = -2.9397, p = \mathbf{0.01345}$   | $t = 3.9259, p = \mathbf{0.002369}$   | $t = -0.30835, p = 0.7636$            | $t = -1.0543, p = 0.3114$            |
| <i>leucopus</i>                                          | 9  | $t = 0.32429, p = 0.7531$             | $t = -0.31635, p = 0.759$             | $t = -0.34159, p = 0.7405$            | $t = 0.95055, p = 0.3667$            |
| <i>gossypinus</i>                                        | 10 | $t = -0.63835, p = 0.95376$           | $t = -0.076451, p = 0.9406$           | $t = -0.60402, p = 0.5593$            | $t = -0.71643, p = 0.4901$           |
| Statistical results are based on paired-student t-tests. |    |                                       |                                       |                                       |                                      |
